# Supplementary material for: A Molecular Modeling Approach to Identify Potential Antileishmanial Compounds Against the Cell Division Cycle (cdc)-2-Related Kinase 12 (CRK12) Receptor of Leishmania donovani
Source: MDPI journal article supplement (doi:10.3390/biom11030458), 2021-03-18
Supplement: s1 [file s1]

Table S1: The binding energies and intermolecular bonds between *Ld*CRK12 and compounds.

| Compound                                         | Binding Energy (kcal/mol) |      | HYDROGEN BONDS [BOND LENGTH (Å)]                              |                                                                                                 | HYDROPHOBIC BONDS                                                                                                          |                                                                                                                       |
|--------------------------------------------------|---------------------------|------|---------------------------------------------------------------|-------------------------------------------------------------------------------------------------|----------------------------------------------------------------------------------------------------------------------------|-----------------------------------------------------------------------------------------------------------------------|
|                                                  | <i>Ld</i> CRK12           | CDK9 | <i>Ld</i> CRK12                                               | CDK9                                                                                            | <i>Ld</i> CRK12                                                                                                            | CDK9                                                                                                                  |
| ZINC000095485940                                 | -10.1                     | -7.7 | Gly468 (2.93),<br>Ser569 (2.95),<br>Asp626 (2.70)             | Arg195 (3.06,<br>3.22), Glu234<br>(2.9), Arg343<br>(3.1)                                        | Leu465, Ser466, Thr469,<br>Val473, Ala486, Lys488,<br>Ser544, Phe563, Asp612,<br>Asn613, Leu615, Thr625                    | Arg188, Leu192,<br>Arg195, Thr233, Glu234,<br>Tyr338, Ala340, Arg343                                                  |
| NANPDB1406                                       | -9.5                      | -7.3 | Lys488 (3.26),<br>Ala566 (2.89, 2.97,<br>3.07), Ser569 (3.01) | Asn232 (2.8),<br>Phe336 (3.08),<br>Ala340 (2.69,<br>3.15), Arg343<br>(2.88, 3.1, 3.17,<br>3.25) | Leu465, Ser466, Gly468,<br>Val473, Ala486, Tyr565,<br>Thr567, Ala568, Asp612,<br>Leu615, Asp626                            | Asn232, Thr233,<br>Met335, Phe336, Tyr338,<br>Ala340, Arg343                                                          |
| NANPDB2581                                       | -9.2                      | -7.5 | Lys610 (3.08)                                                 | Arg195 (3.32),<br>Arg343 (3.09,<br>3.35)                                                        | Leu465, Ser466, Thr469,<br>Tyr470, Ala568, Ser569,<br>Asp612, Asn613, Leu615,<br>Asp626                                    | Leu192, Arg195, Thr233,<br>Glu234, Pro341, Pro342,<br>Arg343                                                          |
| NANPDB6446                                       | -9.1                      | -7.3 | Ser569 (2.77, 3.02),<br>Arg575 (2.87, 3.15)                   | Asn179 (3.04),<br>Tyr259 (2.89)                                                                 | Leu465, Ser466, Ala568,<br>Gly572, Asp612, Asp626                                                                          | Asn179, Pro182, Glu203,<br>Asp205, Trp253,<br>Asn258, Tyr259, Pro300                                                  |
| Compound 8                                       | -9.1                      | -9.0 | Leu723 (2.83)                                                 | Lys48 (2.91),<br>Asp149 (2.99,<br>3.08)                                                         | Gly724, Pro725, Leu726,<br>Pro727, Pro728, Val731,<br>Leu743, Glu747, Asn763,<br>Trp764, Gln815, Leu816                    | Thr29, Phe30, Leu51,<br>Pro60, Thr62, Asp149,<br>Leu170, Arg188, Val190,<br>Thr191, Leu192, Met335                    |
| T6Q                                              | -9.1                      | -9.2 | Thr469 (3.06)                                                 | Glu203 (2.99),<br>Asn255 (3.07)                                                                 | Leu465, Ser466, Gly468,<br>Thr469, Val473, Lys488,<br>Ala568, Ser569, Arg575,<br>Lys610, Asp612, Asn613,<br>Leu615, Asp626 | Pro182, Glu198, Gly202,<br>Asp205, Tyr206, Gly207,<br>Tyr259, Glu198, Trp253,<br>Tyr259, Glu260, Pro300               |
| T6Q (2nd pose with CDK9)                         | -                         | -8.6 | -                                                             | -                                                                                               | -                                                                                                                          | Ile25, Phe30, Val33,<br>Ly48, Asp109, Gly112,<br>Ala153, Leu156, Ala166,<br>Asp167, His331, Leu332,<br>Thr333         |
| T6Q (CDK9-T6Q complex as obtained from RCSB PDB) | -                         | -    | -                                                             | Cys106 (2.76,<br>3.02)                                                                          | -                                                                                                                          | Ile25, Phe30, Val33,<br>Ala46, Val79, Phe103,<br>Asp104, Phe105, Glu107,<br>Asp109, Ala153,<br>Asn154, Leu156, Asp167 |
| NANPDB267                                        | -9                        | -7.6 | Lys488 (3.04, 3.24),                                          | Arg343 (2.85,                                                                                   | Leu465, Ser466, Gly468,                                                                                                    | Asn232, Thr233,                                                                                                       |

|                  |      |      |                                                                                                |                                                                        |                                                                                                |                                                                                                           |
|------------------|------|------|------------------------------------------------------------------------------------------------|------------------------------------------------------------------------|------------------------------------------------------------------------------------------------|-----------------------------------------------------------------------------------------------------------|
|                  |      |      | Asp626 (3.05)                                                                                  | 3.05, 3.06, 3.12, 3.2)                                                 | Tyr470, Val473, Ala566, Thr567, Ala568, Ser569, Asp612, Leu615                                 | Met335, Phe336, Tyr338, Ala340, Arg343                                                                    |
| NANPDB2521       | -8.7 | -6.8 | Gly636 (3.01), Thr642 (2.77), His643 (2.94), Gly663 (3.00), Tyr667 (2.80), Asp668 (2.75, 3.16) | Thr233 (3.02), Tyr338 (3.07), Ala340 (2.91), Arg343 (2.85, 3.2, 3.26)  | Pro635, Glu659, Leu662, Ser664, Thr665, Ala666, Met740, Pro818                                 | Thr233, Phe336, Tyr338, Leu339, Ala340, Pro342, Arg343                                                    |
| NANPDB2966       | -8.7 | -8   | Gln819 (3.21)                                                                                  | -                                                                      | Thr642, His643, Glu659, Ser664, Asp668, Ser730, His733, Pro818                                 | Arg188, Leu192, Thr233, Met335, Tyr338, Leu339, Ala340, Pro342, Arg343                                    |
| NANPDB3435       | -8.7 | -8.1 | Thr642 (3.02), Thr665 (2.79, 2.89, 3.05), Ala666 (3.1), Tyr667 (3.17), Gln819 (2.97)           | Arg195 (3.1), Glu234 (2.83), Ala340 (2.91, 2.96, 3.21)                 | Glu659, Ser664, Asp668, Ser730, His733, Met740, Pro818                                         | Thr233, Glu234, Met335, Phe336, Tyr338, Leu339, Ala340, Pro342, Arg343                                    |
| NANPDB3284       | -8.6 | -6.6 | Ala566 (2.8, 3.06), Ser569 (3.01, 3.04)                                                        | Asn232 (3.28), Phe336 (2.92), Ala340 (2.93), Arg343 (2.88, 3.06, 3.24) | Leu465, Ser466, Ala486, Lys488, Tyr565, Ala568, Asp612, Leu615                                 | Asn232, Thr233, Met335, Phe336, Tyr338, Ala340, Arg343                                                    |
| NANPDB4609       | -8.6 | -6.6 | Leu465 (2.7), Ala566 (3.15), Thr567 (2.83), Ser569 (2.74, 3.13)                                | Gly207 (3.23, 3.24), Trp253 (3.15, 3.15), Pro254 (3.17), Tyr259 (3.12) | Ser466, Val473, Ala486, Lys488, Gly572, Ala568, Asp612, Leu615, Thr625, Asp626                 | Glu198, Glu203, Asp205, Tyr206, Gly207, Pro209, Trp253, Asn255, Tyr259, Pro300                            |
| NANPDB2582       | -8.6 | -7.3 | Lys488 (3.13)                                                                                  | Arg343 (3.15)                                                          | Leu465, Ser466, Gly468, Thr469, Tyr470, Val473, Ala568, Ser569, Asp612, Asp626                 | Asn232, Thr233, Glu234, Gln235, Met335, Phe336, Tyr338, Pro341, Pro342, Arg343                            |
| NANPDB3239       | -8.6 | -7.7 | Ser466 (3.06), Lys488 (3.09), Ala566 (2.97), Asp626 (2.76)                                     | Gly207 (3.19), Asn255 (2.79, 3.11), Tyr259 (2.82, 3.13)                | Leu465, Gly468, Val473, Ala486, Thr567, Ala568, Ser569, Gly572, Arg576, Asp612, Leu615         | Pro182, Gly202, Glu203, Arg204, Asp205, Tyr206, Asn255, Asn258, Tyr259, Pro300                            |
| Amphotericin B   | -8.6 | -8.1 | Arg603 (2.86, 2.8), Pro635 (3.11, 3.0), Tyr845 (2.74), Gln846 (3.04), Arg847 (3.22)            | Ala340 (2.84)                                                          | Pro635, Gly636, Thr642, His643, Glu669, Lys670, Thr823, Glu826, Tyr845, Gln846, Arg847, Leu849 | Val50, Leu51, Glu53, Glu55, Pro60, Thr62, Gly169, Arg188, Leu192, Thr233, Leu339, Ala340, Pro341, Pro342, |
| ZINC000095486260 | -8.5 | -6.4 | Ser569 (2.96, 2.96, 3.17, 3.25), Asp612 (2.79, 2.88)                                           | Asn179 (3.13), Trp253 (3.0, 3.29), Asn255 (2.88), Tyr259               | Leu465, Ser466, Gly468, Val473, Lys488, Ala566, Ala568, Ala571, Leu615, Asp626                 | Glu203, Asp205, Trp253, Asn255, Asn258, Tyr259, Asp299, Pro300                                            |

|                                         |      |      |                                                                                                                                                                               |                                                                                                                                 |                                                                                                                                    |                                                                                                 |
|-----------------------------------------|------|------|-------------------------------------------------------------------------------------------------------------------------------------------------------------------------------|---------------------------------------------------------------------------------------------------------------------------------|------------------------------------------------------------------------------------------------------------------------------------|-------------------------------------------------------------------------------------------------|
|                                         |      |      |                                                                                                                                                                               | (2.96), Asp299<br>(2.86)                                                                                                        |                                                                                                                                    |                                                                                                 |
| NANPDB3614                              | -8.5 | -7.4 | Lys488 (2.80)                                                                                                                                                                 | Trp223 (2.92),<br>Arg284 (3.24,<br>3.29), Asp285<br>(2.97)                                                                      | Leu465, Ser466, Tyr470,<br>Val473, Ala486, Ala568,<br>Ser569, Asp612, Asn613,<br>Leu615, Asp626                                    | Phe121, Thr122, Leu123,<br>Ile126, Trp223, Arg225,<br>Val283, Arg284, Asp285                    |
| ZINC000000828203                        | -8.5 | -7.4 | Lys488 (2.91)                                                                                                                                                                 | Trp223 (2.8),<br>Arg284 (3.27),<br>Asp285 (2.93)                                                                                | Leu465, Ser466, Tyr470,<br>Val473, Ala486, Ala566,<br>Ala568, Ser569, Asp612,<br>Asn613, Leu615, Asp626                            | Phe121, Thr122, Le123,<br>Ile126, Trp223, Arg225,<br>Val283, Arg284, Asp285                     |
| NANPDB1011                              | -8.5 | -7.7 | Thr642 (3.24),<br>Ser664 (2.94),<br>Thr665 (2.71, 3.23)                                                                                                                       | Asp205 (2.89),<br>Gly207 (3.3),<br>Asp299 (3.33)                                                                                | Ala634, Pro635, Gly636,<br>His643, Glu659, Tyr667,<br>Asp668, Lys670, Val729,<br>Ser730, His733, Pro818,<br>Gln819                 | Pro182, Glu203, Asp205,<br>Tyr206, Pro209, Asn255,<br>Asn258, Tyr259, Pro300,<br>Ala301         |
| NANPDB1649                              | -8.5 | -7.7 | Arg575 (3.29)                                                                                                                                                                 | Gly207 (3.02)                                                                                                                   | Leu465, Ser466, Glu467,<br>Gly468, Val473, Lys488,<br>Ala568, Ser569, Asp612,<br>Asn613, Leu615, Asp626                            | Pro182, Glu203, Asp205,<br>Tyr206, Gly207, Trp253,<br>Asn255, Tyr259, Pro300                    |
| NANPDB3949                              | -8.5 | -8.1 | Leu746 (3.2)                                                                                                                                                                  | Asn179 (3.07),<br>Asp205 (2.86),<br>Gly207 (2.91)                                                                               | Pro725, Leu726, Pro727,<br>Pro728, Val731, Leu743,<br>Glu747, Pro761                                                               | Phe174, Ser175, Leu176,<br>Ala177, Asp205, Tyr206,<br>Gly207, Pro209, Pro300                    |
| ZINC000095485880                        | -8.5 | -8.2 | Thr469 (2.73),<br>Ala564 (2.95)                                                                                                                                               | Arg195 (3.23)                                                                                                                   | Leu465, Ser466, Glu467,<br>Gly468, Val473, Ala486,<br>Lys488, Ala566, Ser569,<br>Arg575, Asp612, Leu615,<br>Thr625, Asp626         | Arg188, Leu192,<br>Arg195, Asn232, Thr233,<br>Glu234, Phe336, Tyr338,<br>Ala340, Pro342, Arg343 |
| DDD853651/<br>GSK3186899/<br>Compound 7 | -8.5 | -8.8 | Ser466 (2.96),<br>Gly468 (3.19),<br>Lys488 (3.03),<br>Ser544 (3.27),<br>Thr625 (3.12),<br>Asp626 (3.31, 3.3),<br>Tyr691 (2.98)                                                | Glu107 (3.07,<br>2.98)                                                                                                          | Gly468, Thr469, Tyr470,<br>Val473, Ala486, Lys488,<br>Phe563, Lys610, Asp612,<br>Leu615, Asp626, Tyr691                            | Ile25, Val33, Lys35,<br>Lys48, Phe103, Glu107,<br>His108, Asp109, Ala166,<br>Asp167             |
| Paromomycin                             | -7.9 | -6.5 | Leu465 (2.98),<br>Ser466 (3.14),<br>Thr469 (3.16),<br>Lys488 (2.98),<br>Arg575 (2.81),<br>Ser569 (2.7, 3.02,<br>3.16), Asp612 (2.9),<br>Asn613 (3.04),<br>Asp626 (2.77, 3.09) | Thr29 (2.95,<br>2.98), Lys48<br>(3.27, 3.32),<br>Glu66 (2.77,<br>3.11), Asp167<br>(3.12), Arg188<br>(2.81, 2.92, 3.21,<br>3.22) | Leu465, Ser466, Glu467,<br>Gly468, Thr469, Tyr470,<br>Val473, Lys488, Ser569,<br>Ala571, Gly572, Lys610,<br>Asp612, Leu615, Asp626 | Thr29, Phe30, Lys48,<br>Ala63, Glu66, Asp149,<br>Asp167, Gly169,<br>Leu170, Arg188              |
| Compound 5                              | -7.2 | -8.6 | Leu723 (2.98, 3.07)                                                                                                                                                           | Cys106 (3.2, 3.0)                                                                                                               | Gly724, Pro725, Leu726,                                                                                                            | Ile25, Val33, Ala46,                                                                            |

|             |      |      |                    |   |                                                                                                                |                                                                                                           |
|-------------|------|------|--------------------|---|----------------------------------------------------------------------------------------------------------------|-----------------------------------------------------------------------------------------------------------|
|             |      |      |                    |   | Pro727, Pro728, Val731, Tyr732, Leu743, Asn763, Trp764, Gln815, Leu816, Asp817, Gln820                         | Lys48, Phe103, Phe105, Glu107, His108, Asp109, Gly112, Leu113, Ala153, Asn154, Leu156, Ala166, Asp167     |
| Miltefosine | -5.0 | -5.6 | Gly422 (3.05, 3.1) | - | Leu181, Gly344, Ile345, Thr396, Arg397, Ala399, Pro401, Thr418, Pro419, Tyr420, Pro421, Gly422, Tyr428, Arg432 | Ile25, Phe30, Val33, Ala46, Lys48, Phe103, Asp109, Ala111, Gly112, Leu156, Ala166, Asp167, Leu332, Thr333 |

Table S2: ADME Prediction of top 19 hits and known drugs for Gastrointestinal (GI); Blood Brain Barrier (BBB); Estimated Solubility (ESOL) class, P-glycoprotein (Pgp) and TPSA.

| Compound         | Molecular Weight | cLogP   | ESOL Class         | GI Absorption | BBB permeant | Pgp substrate | TPSA   |
|------------------|------------------|---------|--------------------|---------------|--------------|---------------|--------|
| ZINC000095485940 | 404.414          | -0.1814 | Soluble            | High          | No           | Yes           | 118.73 |
| NANPDB1406       | 316.221          | 1.5531  | Soluble            | High          | No           | No            | 130.34 |
| NANPDB2581       | 323.347          | 3.3633  | Moderately soluble | High          | Yes          | No            | 40.16  |
| NANPDB6446       | 365.381          | -0.8296 | Very soluble       | High          | No           | Yes           | 101.13 |
| Compound 8       | 478.49           | 3.4878  | Moderately soluble | High          | No           | Yes           | 96.03  |
| T6Q              | 462.57           | 3.6685  | Moderately soluble | Low           | No           | Yes           | 138.31 |
| NANPDB267        | 317.340          | 1.6813  | Soluble            | High          | No           | No            | 68.23  |
| NANPDB2521       | 290.270          | 1.5087  | Soluble            | High          | No           | Yes           | 110.38 |
| NANPDB2966       | 438.518          | 2.5429  | Moderately soluble | High          | No           | Yes           | 86.11  |
| NANPDB3435       | 434.399          | 3.2155  | Moderately soluble | High          | No           | No            | 133.52 |

|                                         |         |         |                    |      |     |     |        |
|-----------------------------------------|---------|---------|--------------------|------|-----|-----|--------|
| NANPDB3284                              | 258.228 | 2.2963  | Soluble            | High | No  | No  | 90.9   |
| NANPDB4609                              | 394.331 | -0.456  | Soluble            | Low  | No  | No  | 151.96 |
| NANPDB2582                              | 383.399 | 2.7549  | Moderately soluble | High | Yes | No  | 66.46  |
| NANPDB3239                              | 446.450 | 1.5786  | Soluble            | Low  | No  | Yes | 145.91 |
| Amphotericin B                          | 924.08  | 0.323   | Moderately soluble | Low  | No  | Yes | 319.61 |
| ZINC000095486260                        | 378.376 | 0.3706  | Soluble            | High | No  | No  | 137.43 |
| NANPDB3614                              | 364.352 | 3.5388  | Moderately soluble | High | Yes | Yes | 63.22  |
| ZINC000000828203                        | 380.351 | 3.1931  | Moderately soluble | High | No  | Yes | 83.45  |
| NANPDB1011                              | 492.738 | 4.7447  | Moderately soluble | High | No  | Yes | 90.15  |
| NANPDB1649                              | 354.357 | 3.2246  | Soluble            | High | Yes | No  | 55.38  |
| NANPDB3949                              | 444.610 | 4.1395  | Moderately soluble | High | No  | No  | 72.83  |
| ZINC000095485880                        | 416.559 | 4.0458  | Moderately soluble | High | Yes | Yes | 57.53  |
| DDD853651/<br>GSK3186899/<br>Compound 7 | 491.53  | 1.9811  | Moderately soluble | Low  | No  | Yes | 133.51 |
| Paromomycin                             | 615.63  | -9.1987 | Highly soluble     | Low  | No  | Yes | 347.32 |
| Compound 5                              | 458.58  | 3.0502  | Moderately soluble | Low  | No  | Yes | 130.27 |
| Miltefosine                             | 407.57  | 0.1224  | Moderately soluble | Low  | No  | Yes | 68.4   |

Table S3: Toxicological profiles of the 17 hits and the known drugs.

| Compound                  | Mutagenic | Tumorigenic | Reproductive Effect | Irritant |
|---------------------------|-----------|-------------|---------------------|----------|
| ZINC000095485940          | none      | none        | none                | none     |
| NANPDB1406                | none      | none        | none                | none     |
| NANPDB2581                | none      | none        | none                | none     |
| NANPDB6446                | high      | high        | none                | high     |
| Compound 8                | none      | none        | none                | none     |
| T6Q                       | none      | none        | none                | none     |
| NANPDB267                 | none      | none        | none                | none     |
| NANPDB2521                | none      | none        | none                | none     |
| NANPDB2966                | none      | none        | none                | none     |
| NANPDB3435                | none      | none        | none                | none     |
| NANPDB3284                | none      | none        | high                | none     |
| NANPDB2582                | none      | none        | none                | none     |
| Amphotericin B            | none      | none        | none                | none     |
| ZINC000095486260          | none      | none        | none                | high     |
| NANPDB3614                | none      | high        | none                | none     |
| ZINC000000828203          | none      | high        | none                | none     |
| NANPDB1011                | none      | none        | none                | none     |
| NANPDB1649                | none      | none        | none                | none     |
| NANPDB3949                | none      | none        | none                | none     |
| ZINC000095485880          | none      | none        | none                | none     |
| DDD853651/<br>GSK3186899/ | none      | low         | none                | none     |

|             |      |      |      |      |
|-------------|------|------|------|------|
| Compound 7  |      |      |      |      |
| Paromomycin | none | none | none | none |
| Compound 5  | none | none | none | none |
| Miltefosine | none | none | none | none |

Table S4: Predicted biology activity of the lead compounds using Prediction of Activity Spectra for Substances (PASS). Pa and Pi represent probable activity and probable inactivity, respectively.

| Compound         | Pa    | Pi    | Activity                   |
|------------------|-------|-------|----------------------------|
| ZINC000095485940 | 0.896 | 0.005 | Antineoplastic             |
|                  | 0.602 | 0.005 | Antiprotozoal              |
| NANPDB1406       | 0.807 | 0.005 | Kinase inhibitor           |
|                  | 0.681 | 0.029 | Antineoplastic             |
|                  | 0.351 | 0.071 | Antiprotozoal (Leishmania) |
| NANPDB2581       | 0.415 | 0.043 | Antiprotozoal (Leishmania) |
| NANPDB6446       | 0.793 | 0.013 | Antineoplastic             |
| NANPDB267        | 0.468 | 0.013 | Antiprotozoal              |
|                  | 0.380 | 0.112 | Antineoplastic             |
| NANPDB2521       | 0.743 | 0.009 | Kinase inhibitor           |
|                  | 0.398 | 0.049 | Antiprotozoal (Leishmania) |
|                  | 0.315 | 0.080 | Dermatologic               |
| NANPDB2966       | 0.932 | 0.005 | Antineoplastic             |
|                  | 0.709 | 0.004 | Antiprotozoal              |
|                  | 0.435 | 0.037 | Antiprotozoal (Leishmania) |
| NANPDB3435       | 0.753 | 0.018 | Antineoplastic             |
|                  | 0.700 | 0.012 | Kinase inhibitor           |
|                  | 0.600 | 0.014 | Antiprotozoal (Leishmania) |
|                  | 0.420 | 0.049 | Dermatologic               |
| NANPDB3284       | 0.696 | 0.013 | Kinase inhibitor           |
|                  | 0.701 | 0.026 | Antineoplastic             |
|                  | 0.371 | 0.061 | Dermatologic               |
| NANPDB2582       | 0.366 | 0.064 | Antiprotozoal (Leishmania) |
|                  | 0.399 | 0.105 | Antineoplastic             |
| ZINC000095486260 | 0.798 | 0.012 | Antineoplastic             |
|                  | 0.437 | 0.036 | Antiprotozoal (Leishmania) |
|                  | 0.439 | 0.044 | Dermatologic               |
|                  | 0.344 | 0.102 | Kinase inhibitor           |
| NANPDB3614       | 0.741 | 0.020 | Antineoplastic             |
|                  | 0.599 | 0.014 | Antiprotozoal (Leishmania) |
| ZINC000000828203 | 0.801 | 0.012 | Antineoplastic             |
|                  | 0.363 | 0.065 | Antiprotozoal (Leishmania) |
| NANPDB1011       | 0.913 | 0.005 | Antineoplastic             |

|                  |       |       |                            |
|------------------|-------|-------|----------------------------|
|                  | 0.604 | 0.015 | Dermatologic               |
| NANPDB1649       | 0.787 | 0.013 | Antineoplastic             |
|                  | 0.391 | 0.052 | Antiprotozoal (Leishmania) |
| NANPDB3949       | 0.895 | 0.005 | Antineoplastic             |
|                  | 0.696 | 0.009 | Antiprotozoal (Leishmania) |
|                  | 0.504 | 0.031 | Dermatologic               |
| ZINC000095485880 | 0.637 | 0.037 | Antineoplastic             |

(A)

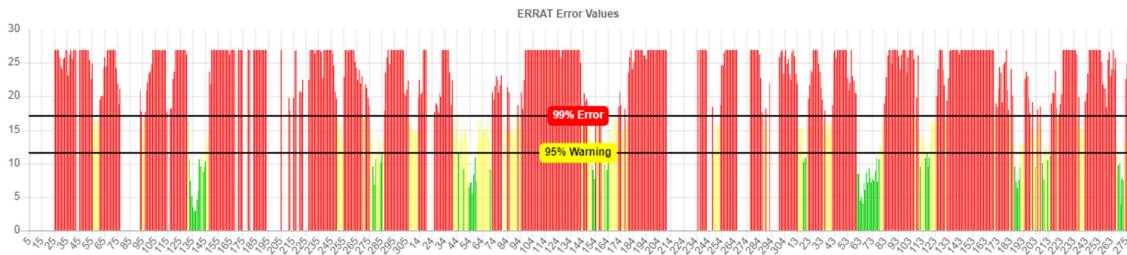

(B)

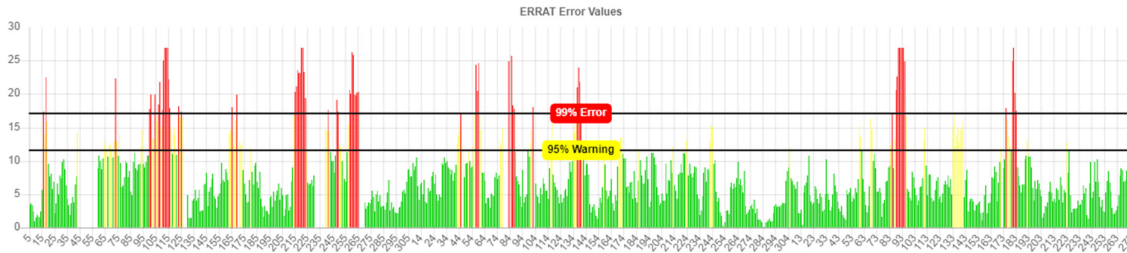

(C)

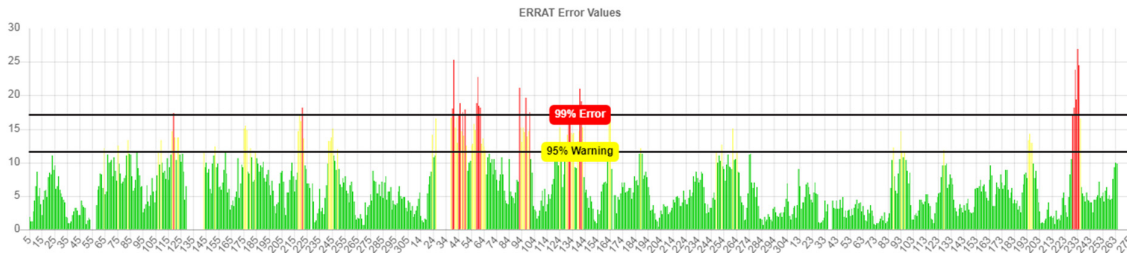

Figure S1: ERRAT error plots of the selected models: (A) ERRAT error plot for MOD5, (B) ITAS5, and (C) ROB1. Red bars represent the misfolded regions, yellow bars demonstrate the error region between 95% and 99%, and green bars indicate the region with a lower error rate for protein folding.



A)

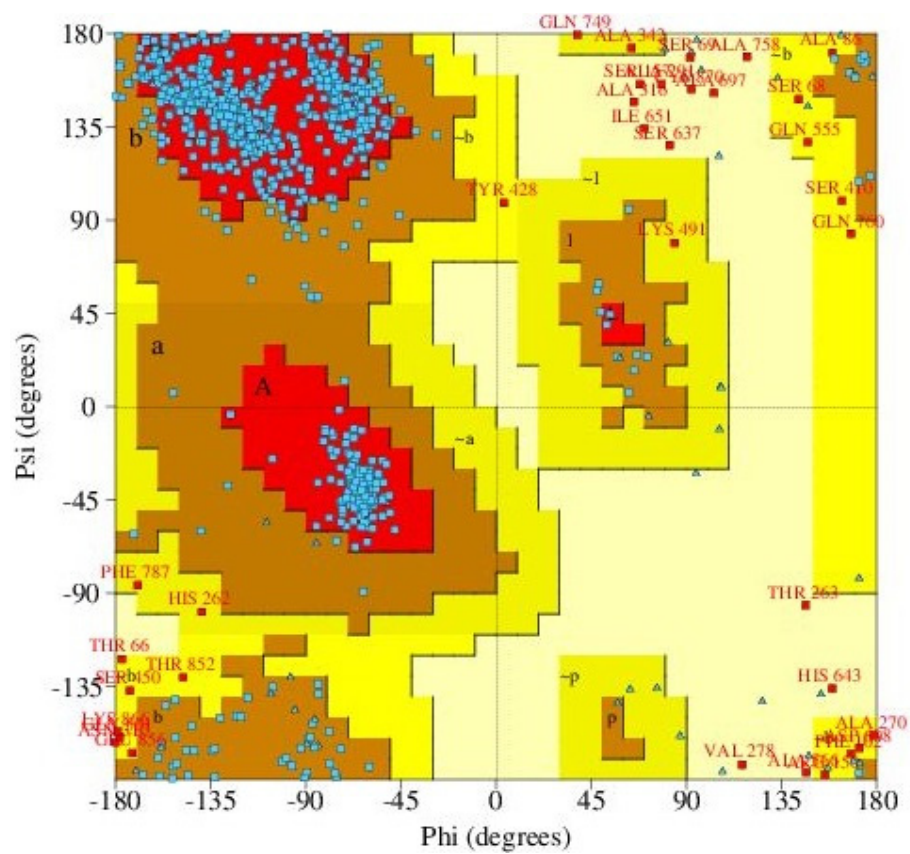

B)

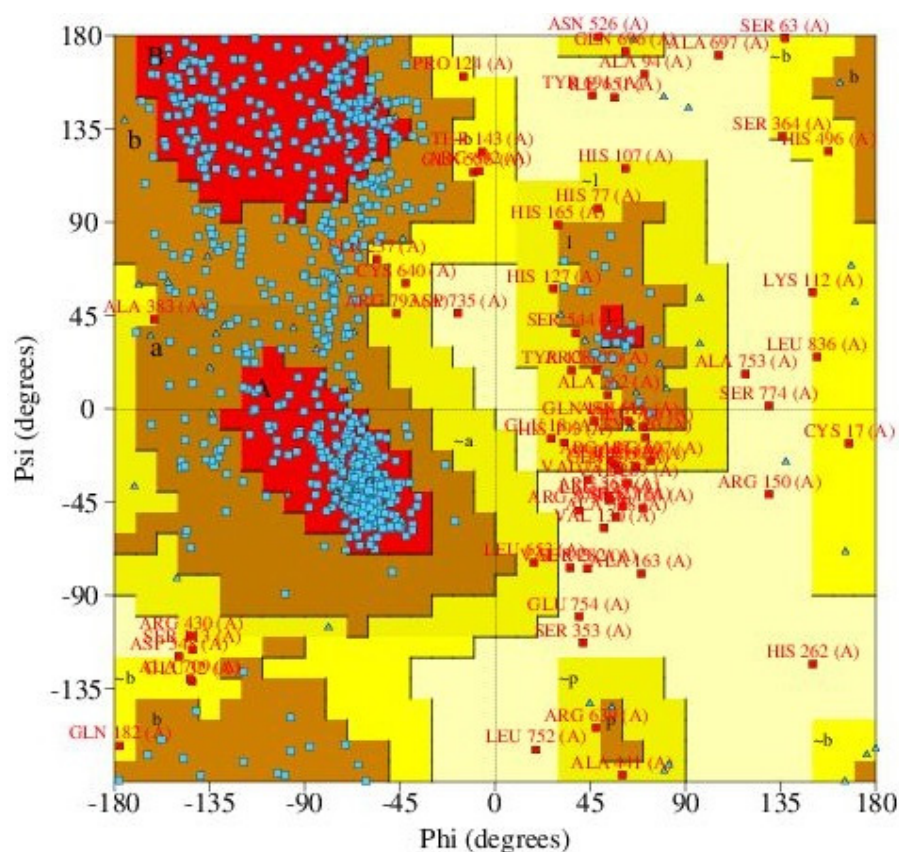

Figure S2: Ramachandran plots of the protein structures obtained via PROCHECK. A) Ramachandran plot of protein model MOD5 and B) Ramachandran plot of protein model ITAS5. The percentages of residues of model MOD5 in the most favoured regions, additionally allowed regions, generously allowed regions and disallowed regions are 79.7, 15.5, 3.0 and 1.8 %, respectively. For model ITAS5, 61.0, 29.8, 5.9 and 3.3 % of the amino acid residues were predicted to be in the most favoured, additionally allowed, generously allowed and disallowed regions, respectively.

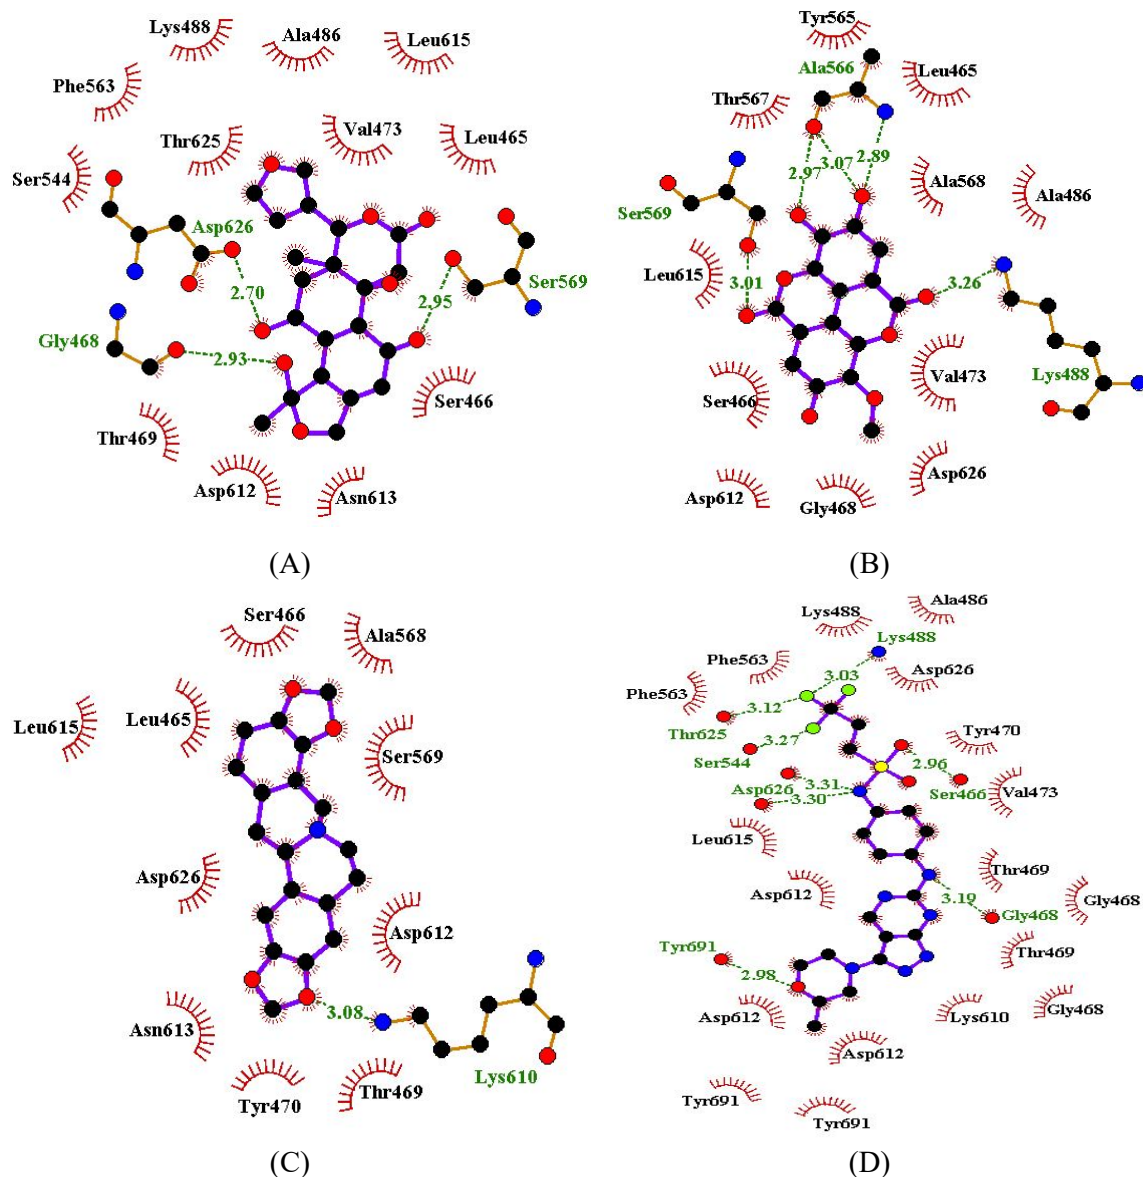

Figure S3: The 2D diagrams of the *LdCRK12*-ligand interaction generated using LigPlot+. Interaction profiles of (A) *LdCRK12*-ZINC000095485940 complex; (B) *LdCRK12*-NANPDB1406 complex; (C) *LdCRK12*-NANPDB2581 complex and (D) *LdCRK12*-GSK3186899 complex. The ligands are coloured in purple, hydrogen bonds are represented as green dash lines and hydrophobic contacts are represented as red spoke arcs.

A)

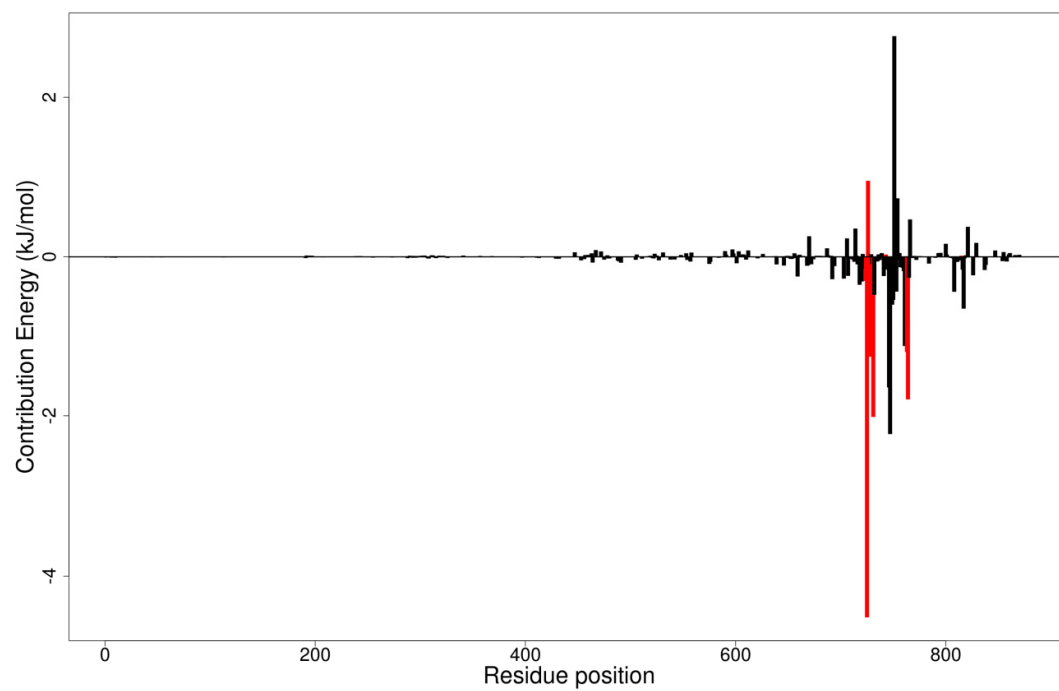

B)

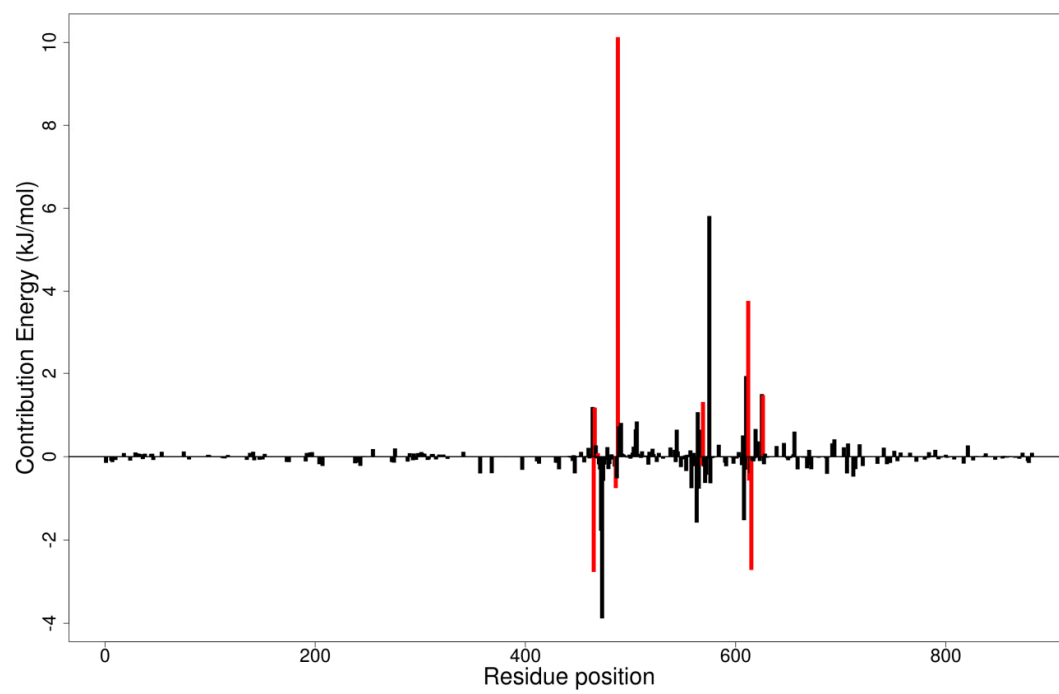

C)

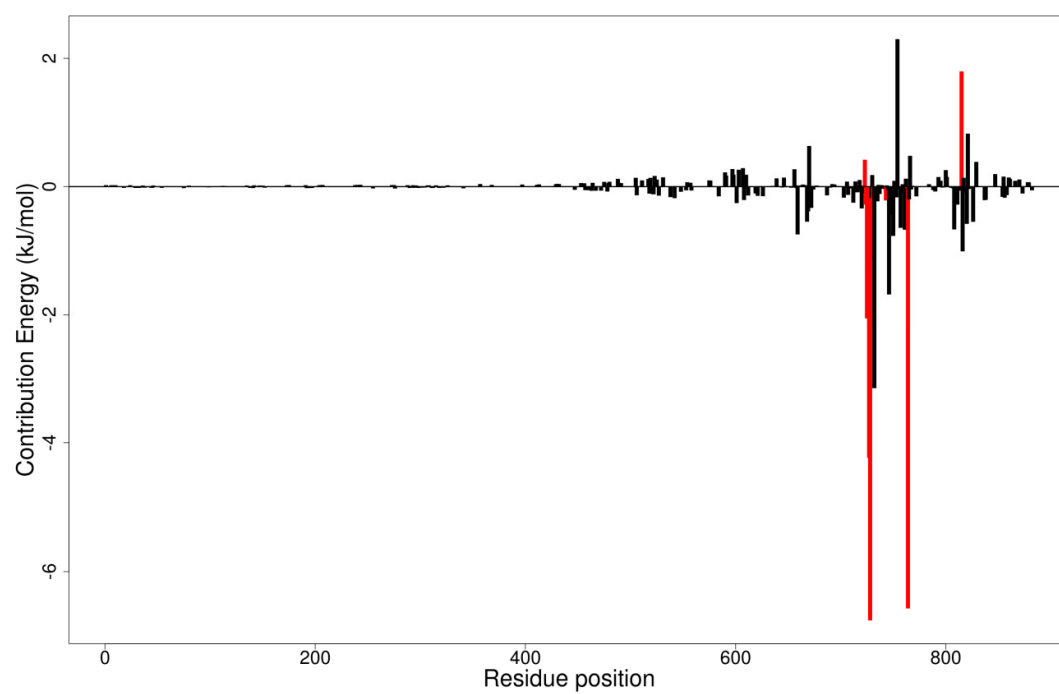

D)

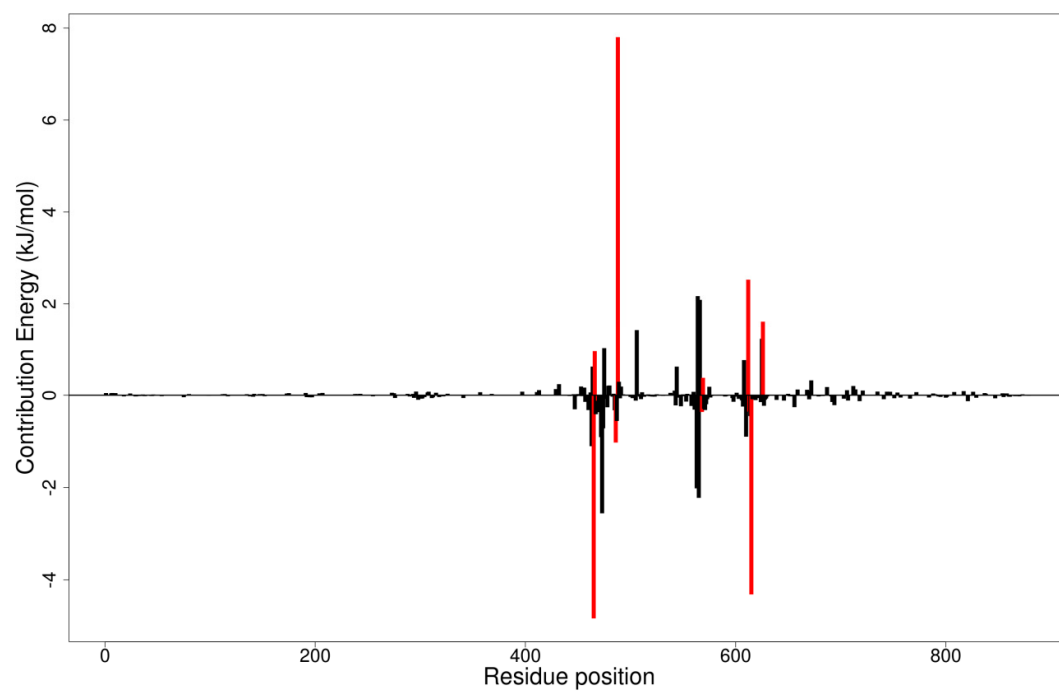

E)

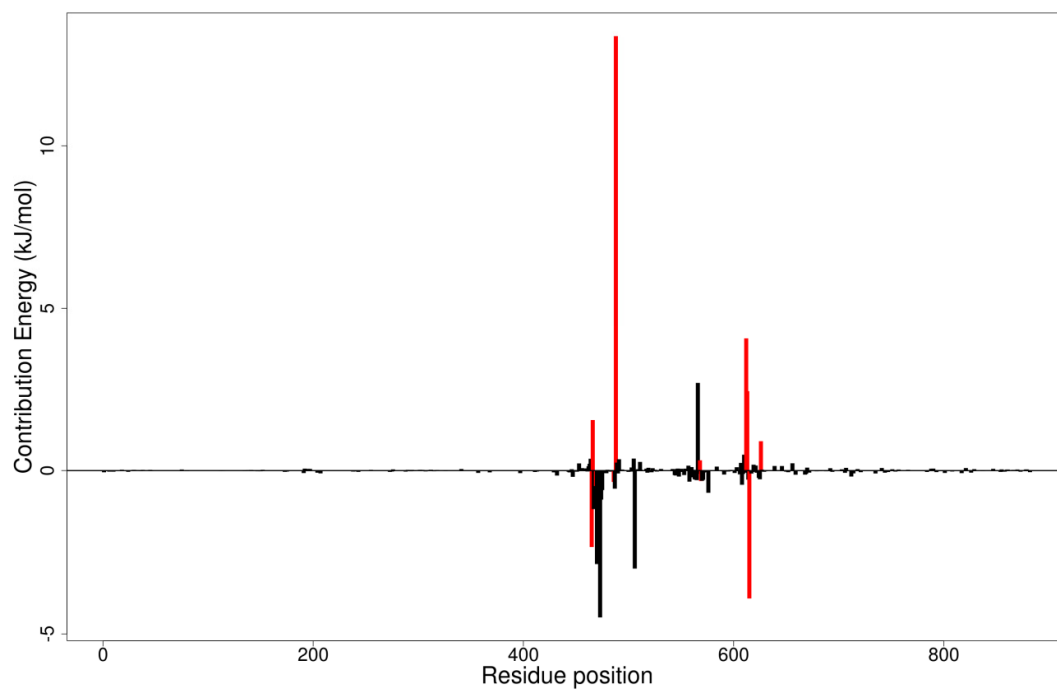

F)

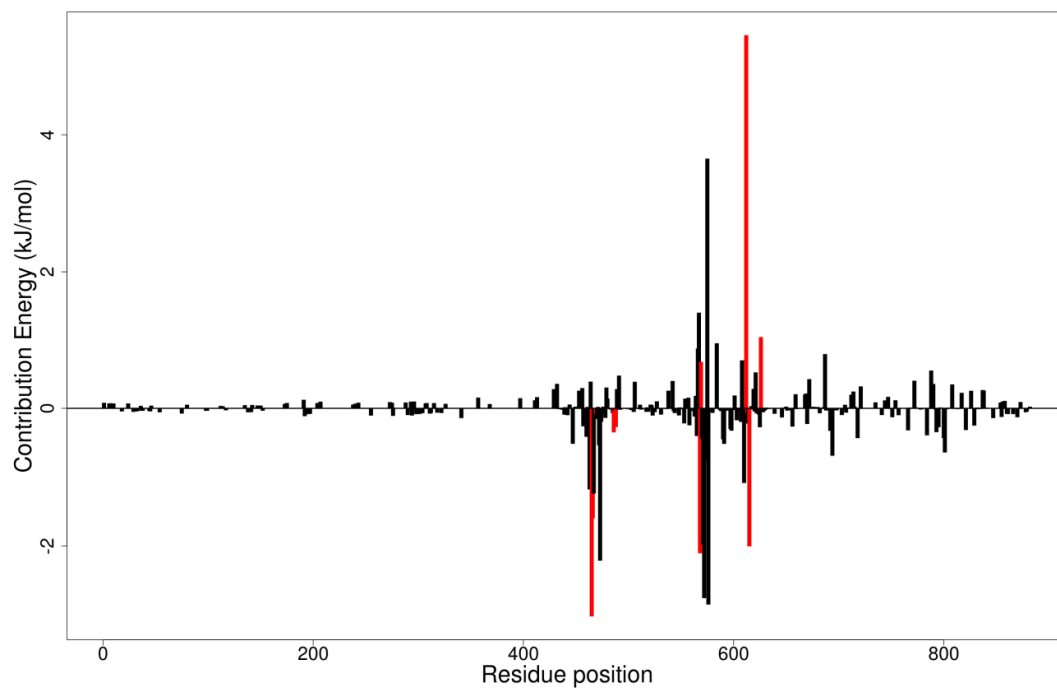

G)

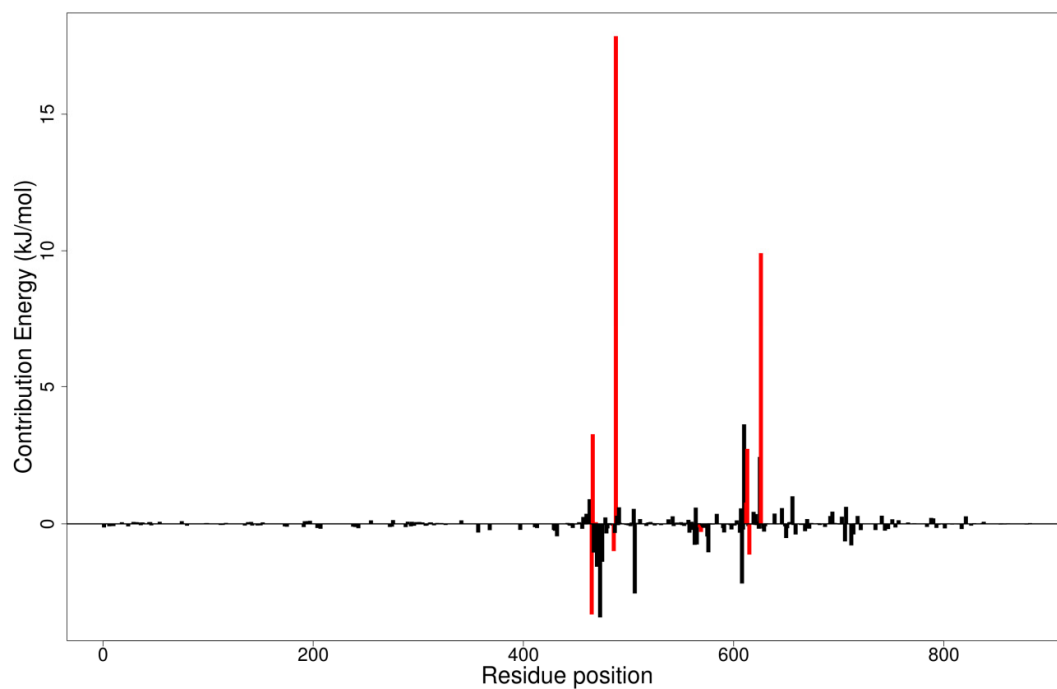

Figure S4: Molecular mechanics Poisson-Boltzmann surface area (MM-PBSA) plot of binding free energy contribution per residue of protein-ligand complexes A) *LdCRK12*-compound 5 B) *LdCRK12*-compound 7; C) *LdCRK12*-compound 8; D) *LdCRK12*-NANPDB1649 E) *LdCRK12*-NANPDB2581 F) *LdCRK12*-NANPDB6446 G) *LdCRK12*-ZINC000095485940.
